# Supplementary material for: tRNA Queuosine Modification Enzyme Modulates the Growth and Microbiome Recruitment to Breast Tumors
Source: MDPI journal article supplement (doi:10.3390/cancers12030628), 2020-03-09

1. QTRT1-knockout (KO) in MCF7 Cells

1.1 Cell culture

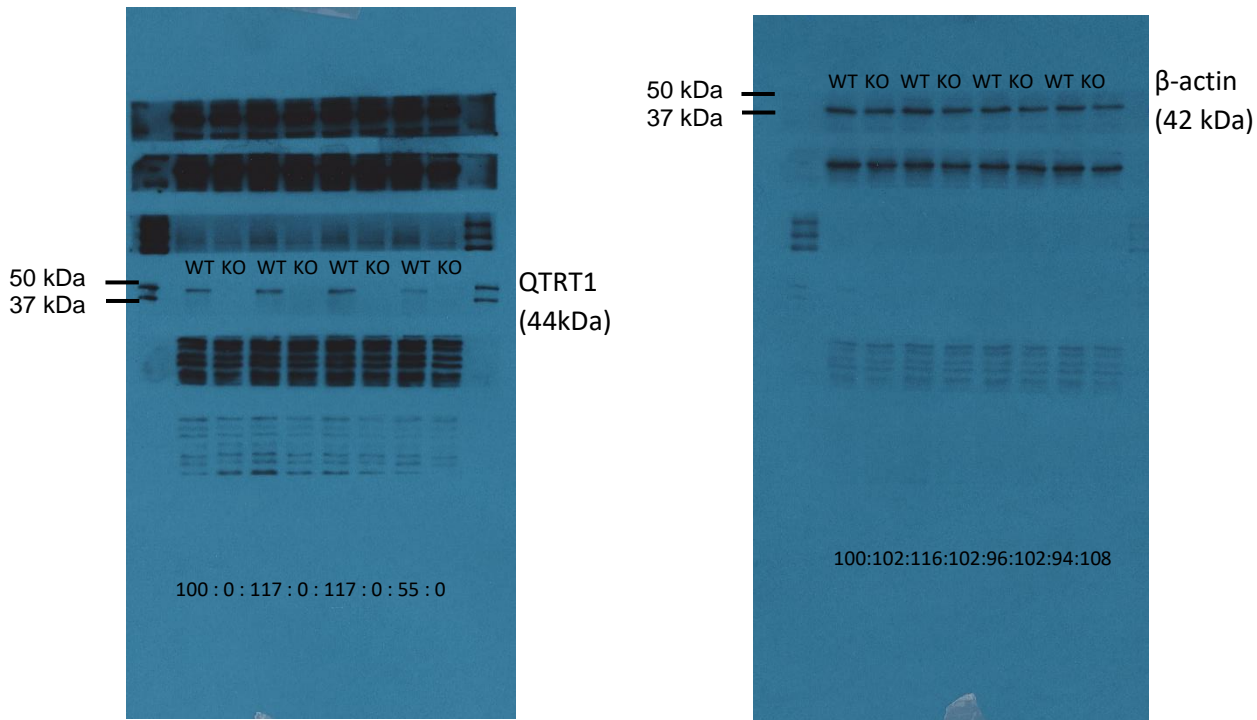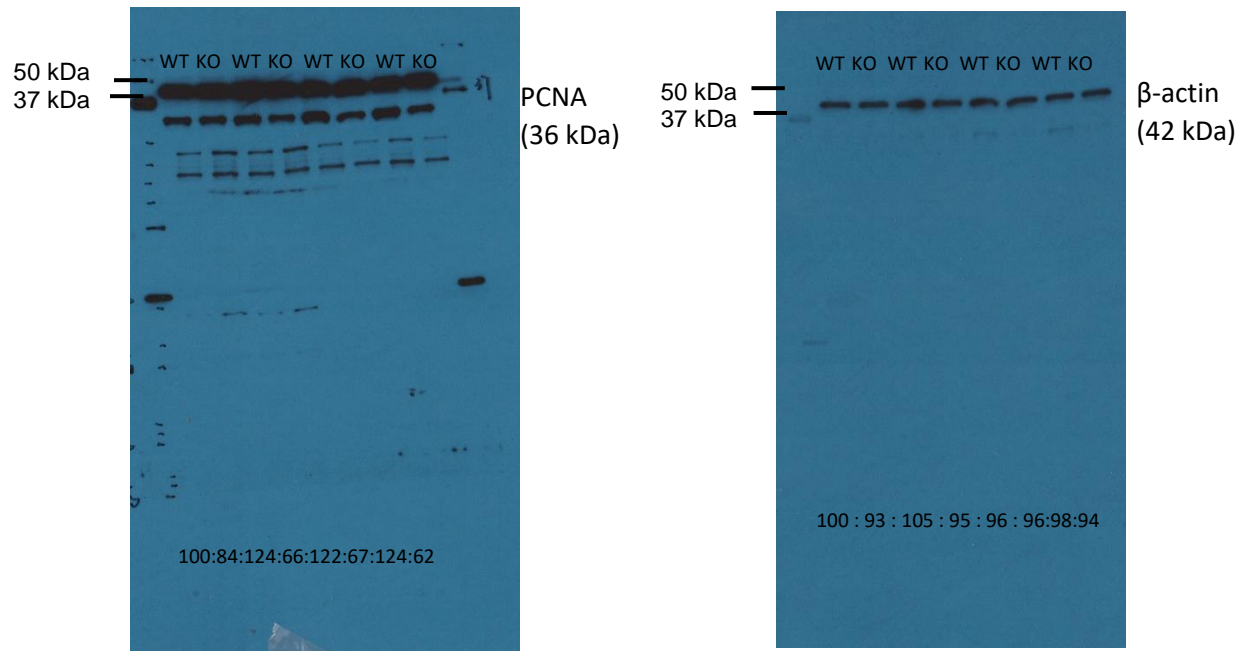

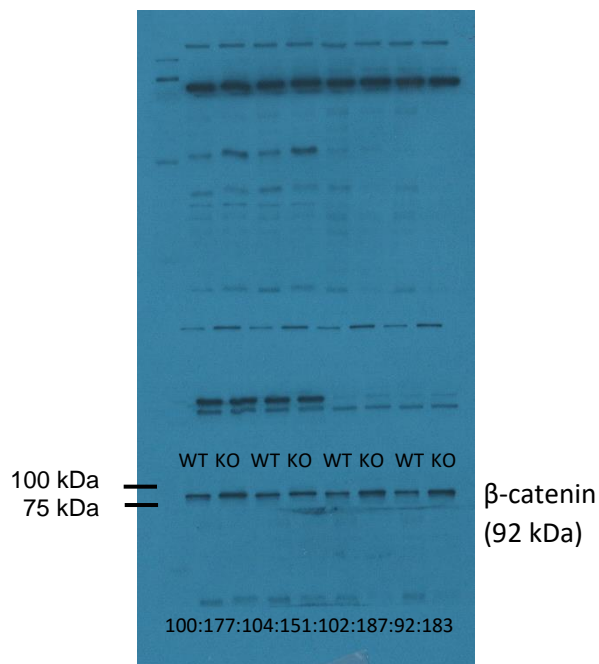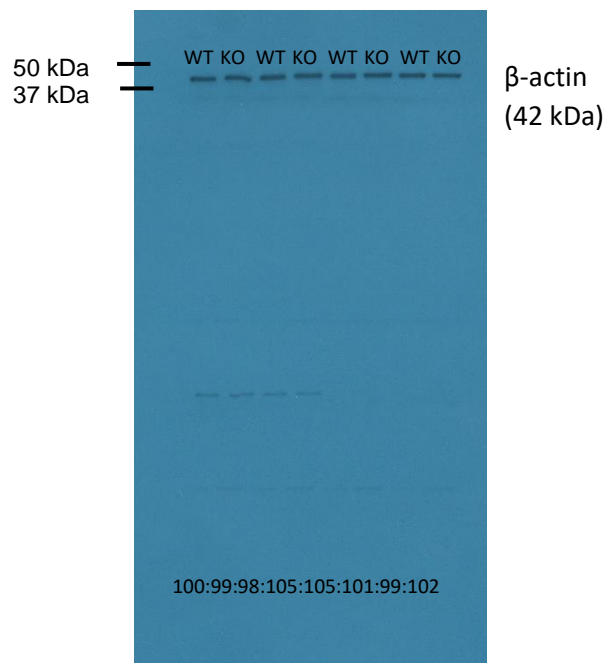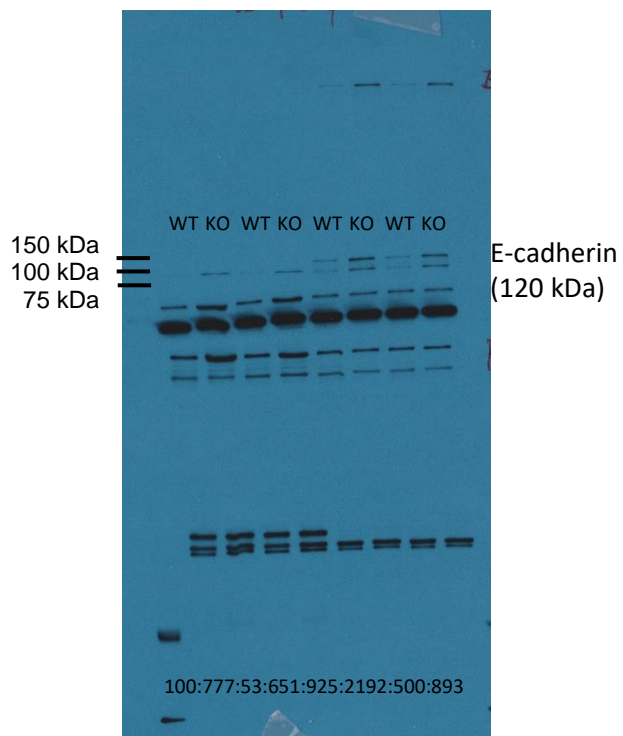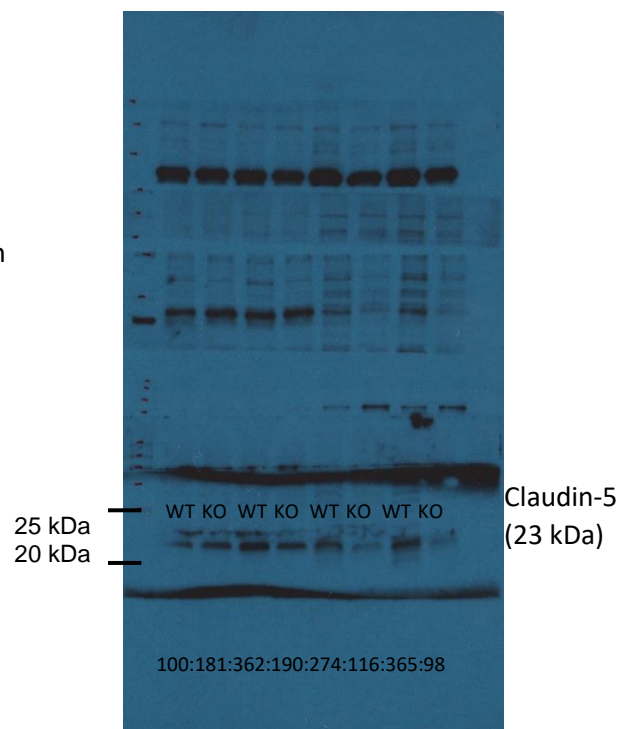

1.2 Nude mouse model

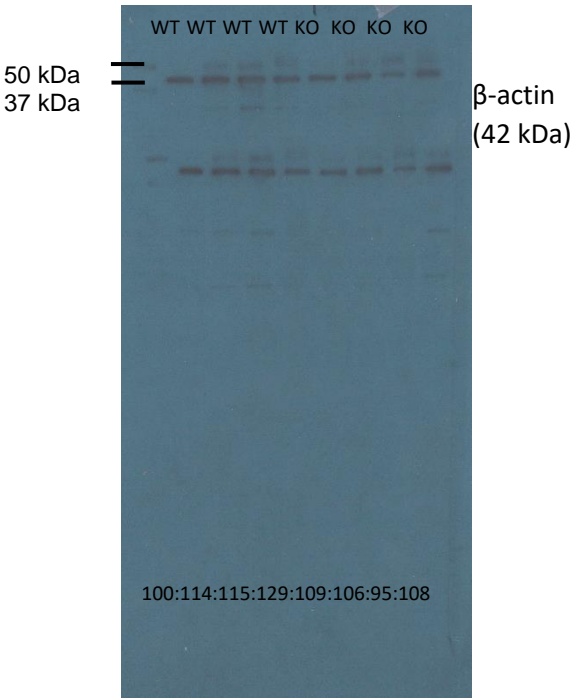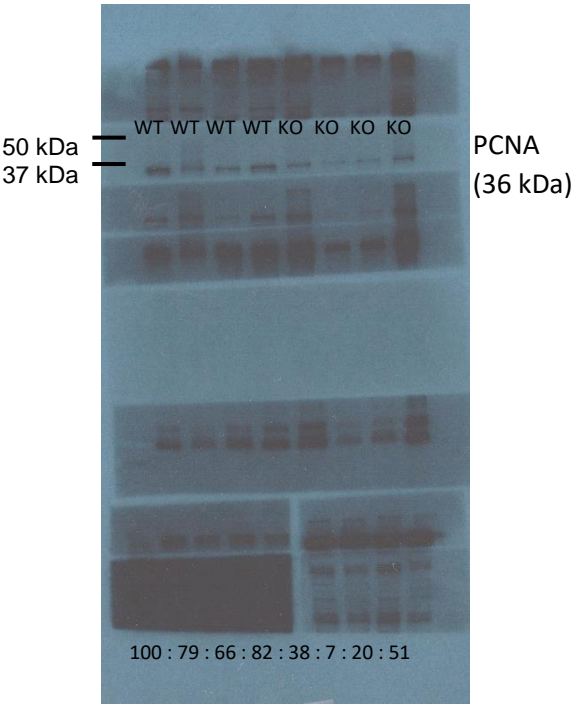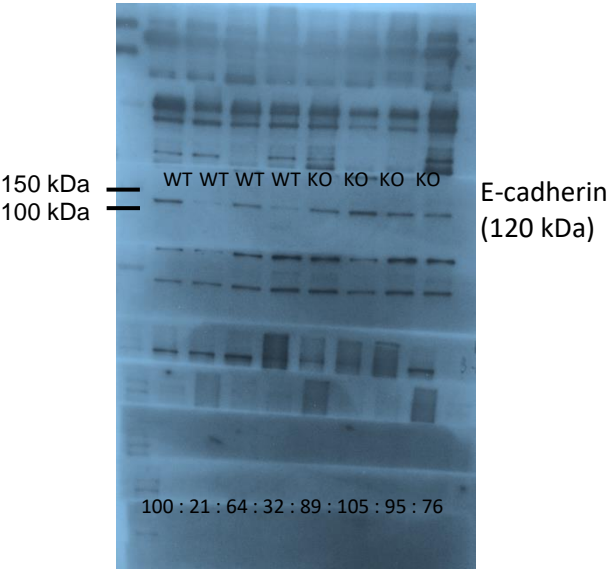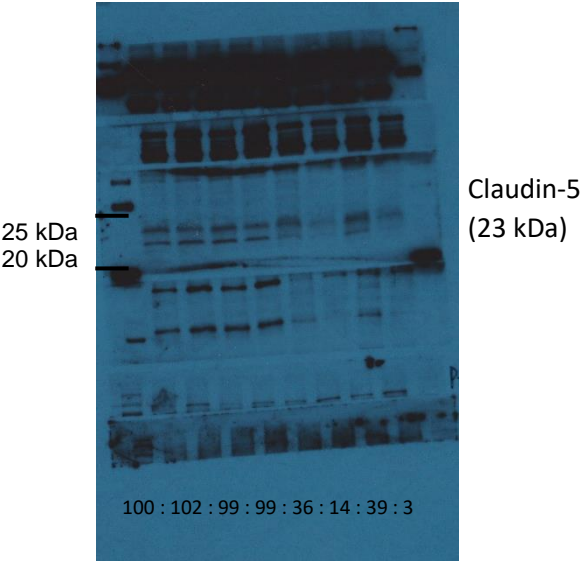

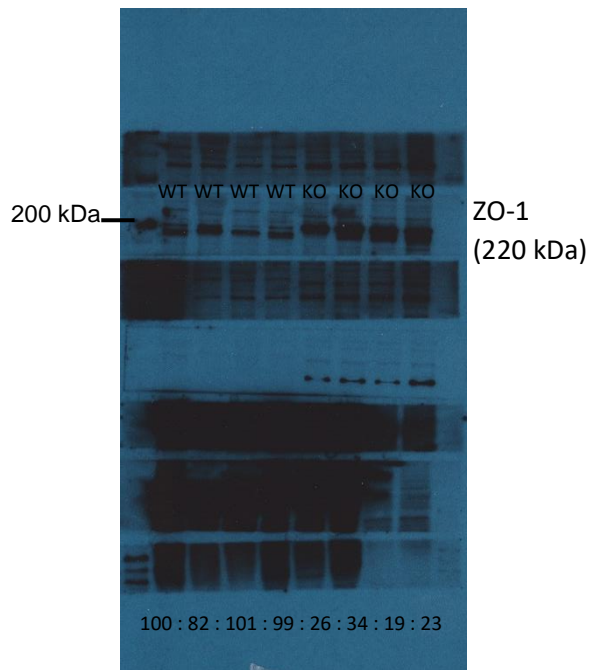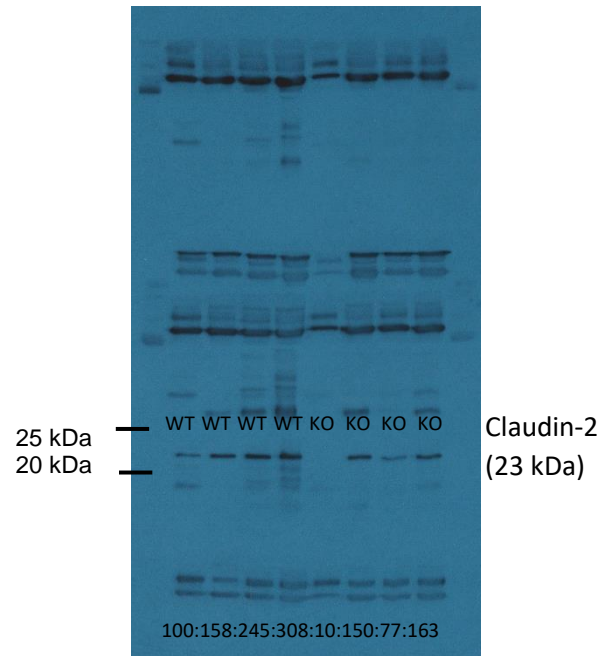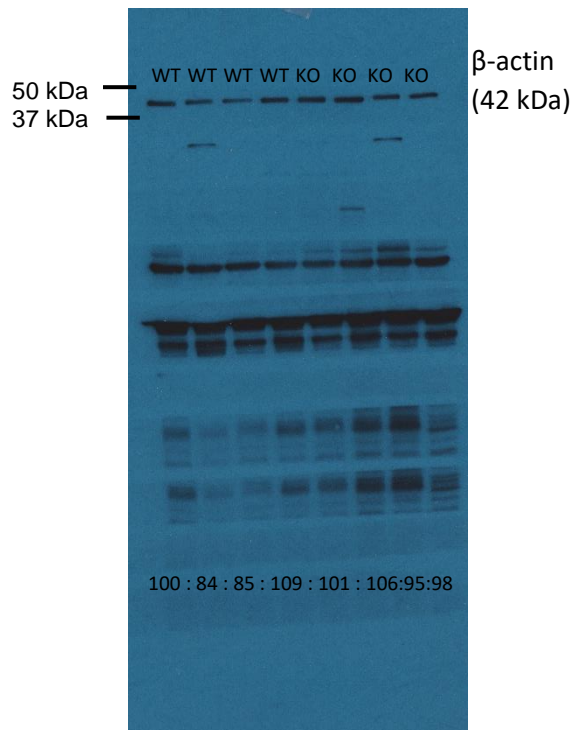

2. QTRT1-knockdown (KD) in MDA-MB-231 Cells

2.1 Cell culture

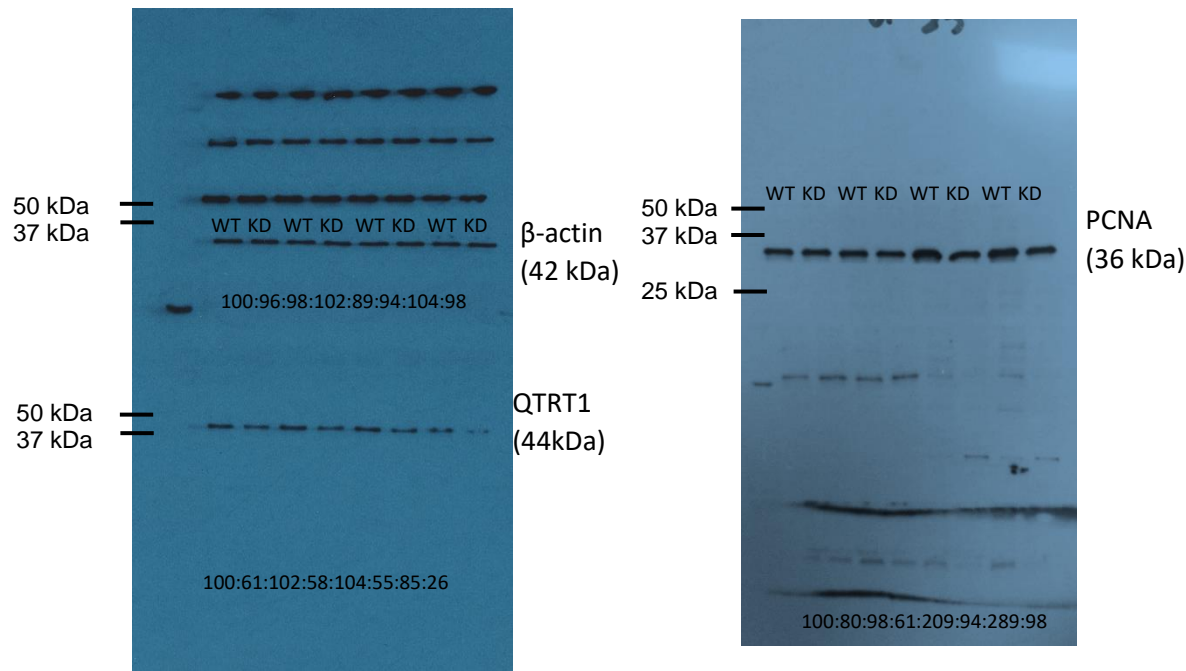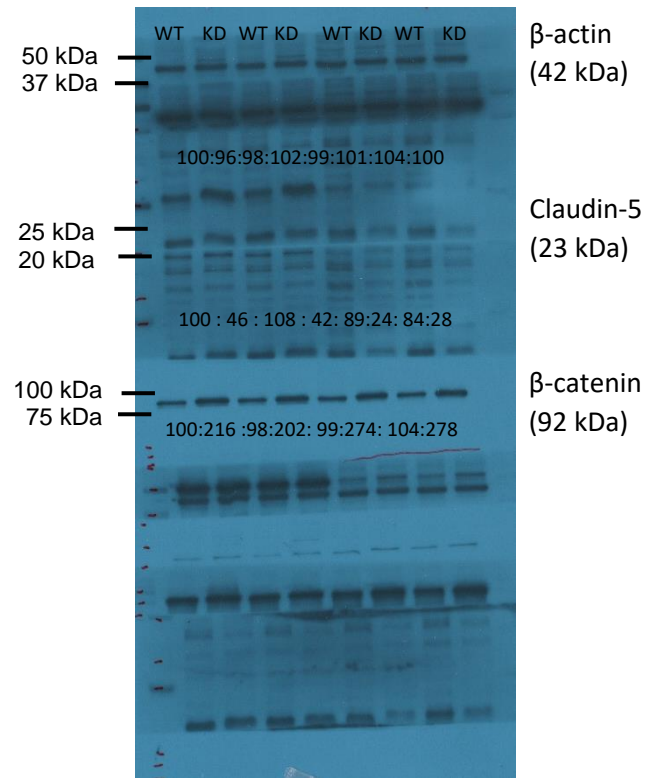



2.2 Nude mouse model

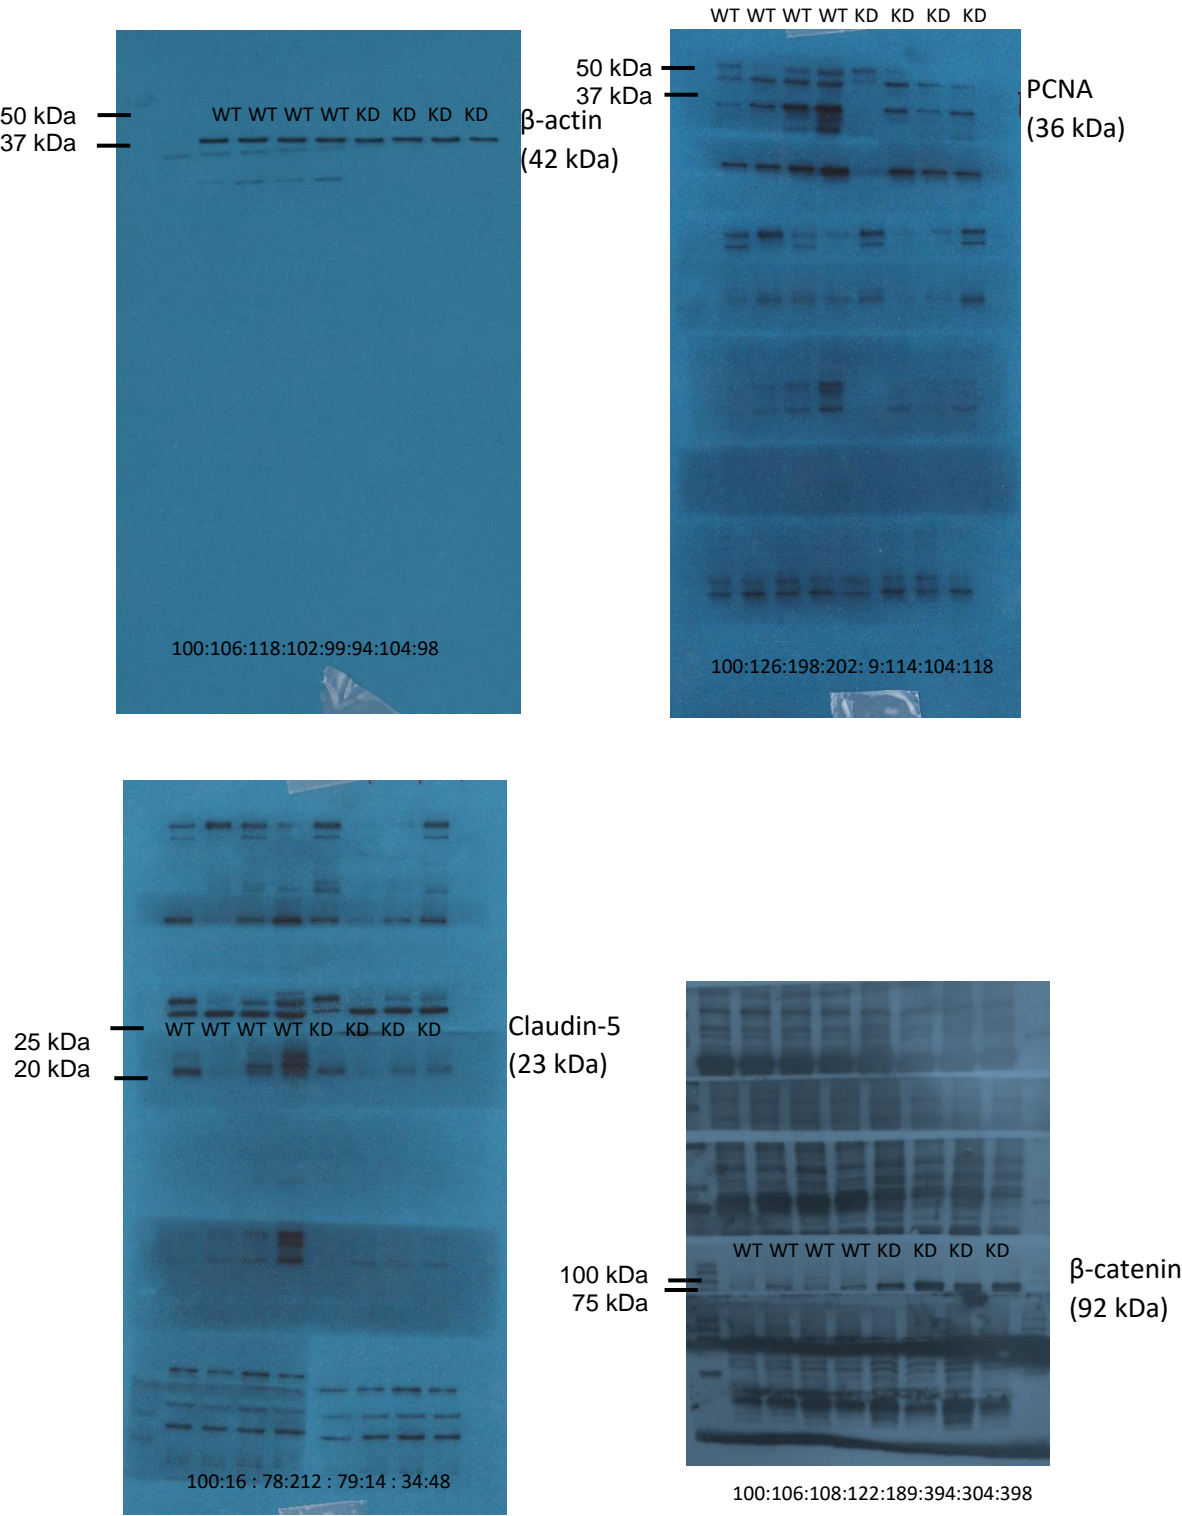

Supplement: s1 [file s1]
